# Supplementary material for: DFT based study of transition metal nano-clusters for electrochemical NH3 production
Source: Royal Society of Chemistry journal article supplement (doi:10.1039/c3cp44641g), 2013-01-01
Supplement: c3cp44641g.pdf [file c3cp44641g.pdf]

## I. SUPPLEMENTARY MATERIAL

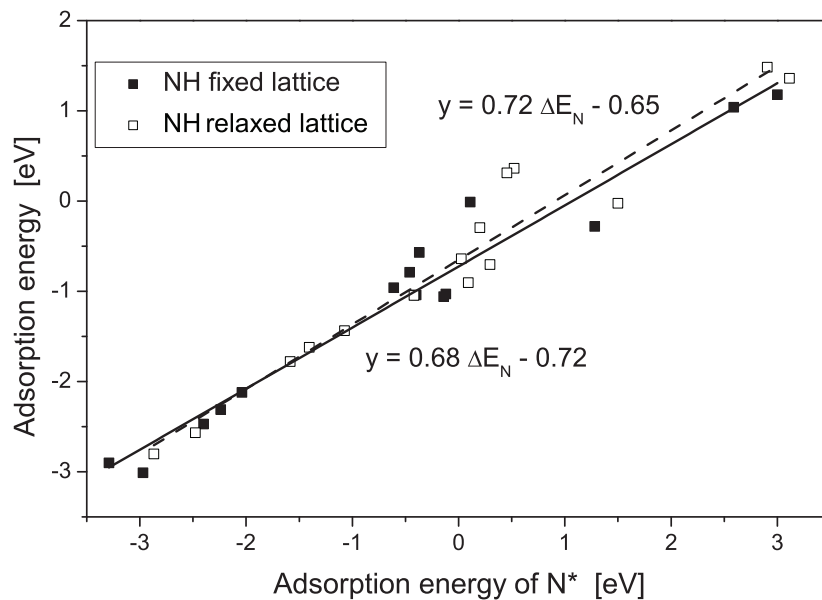

FIG. 1. The scaling relations of the NH specie on both the bulk M12 and relaxed M12.

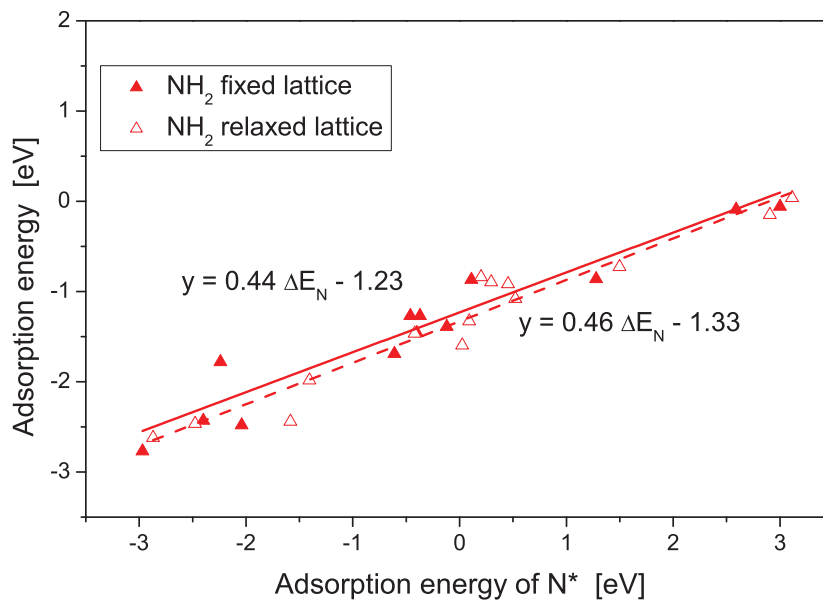

FIG. 2. The scaling relations of the NH<sub>2</sub> specie on both the bulk M12 and relaxed M12.

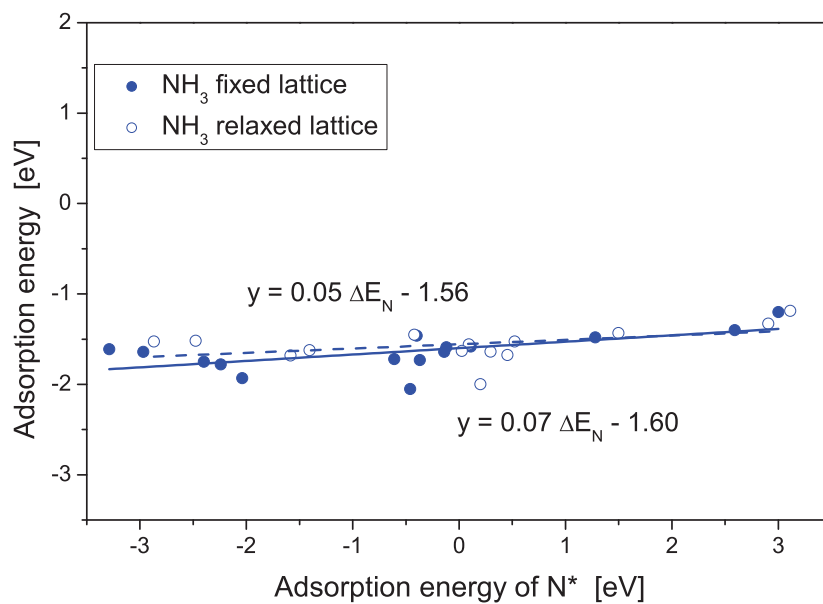

FIG. 3. The scaling relation of the  $\text{NH}_3$  specie both the bulk M12 and relaxed M12.

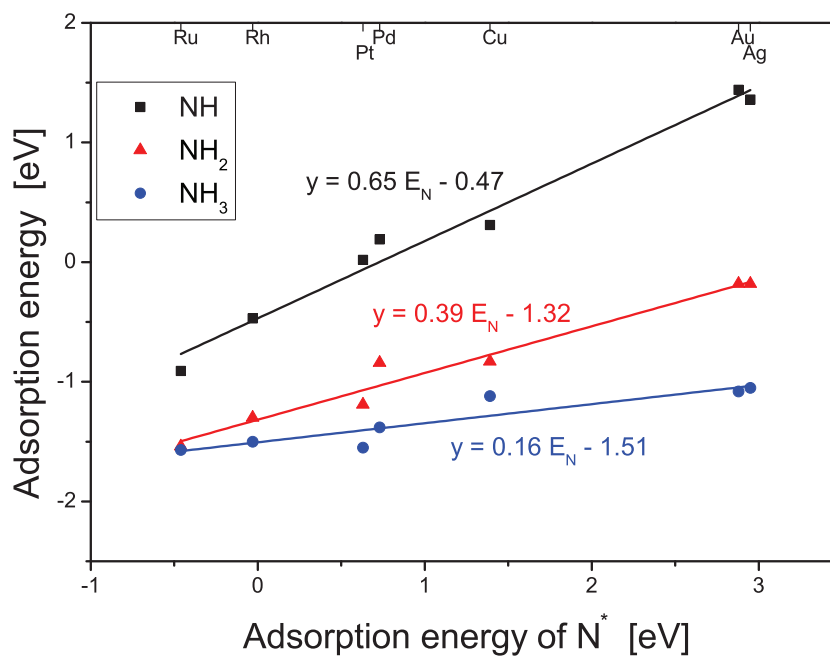

FIG. 4. The scaling relations for  $\text{NH}_x$  species on the stepped  $\text{fcc}(211)$  surface consisting of transition metals.

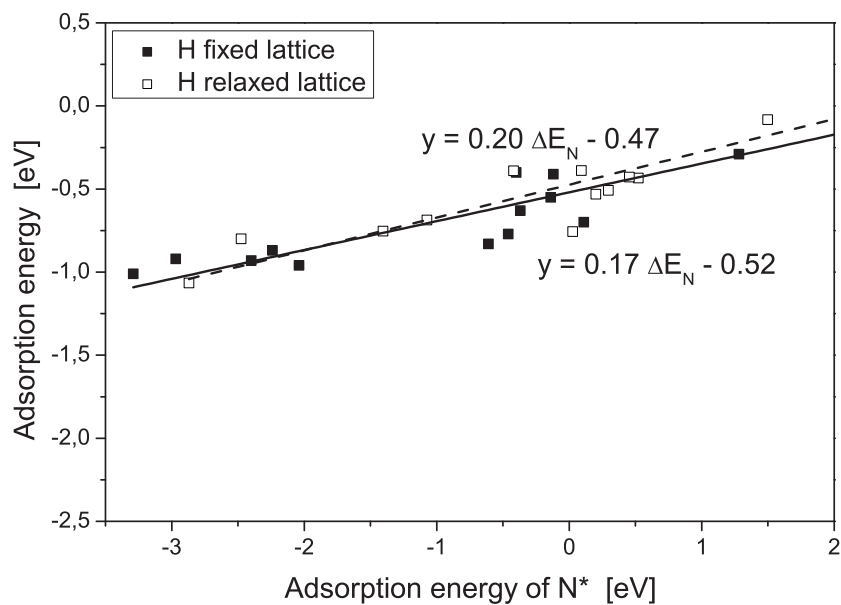

FIG. 5. The scaling relations of H on both the bulk M12 and relaxed M12.

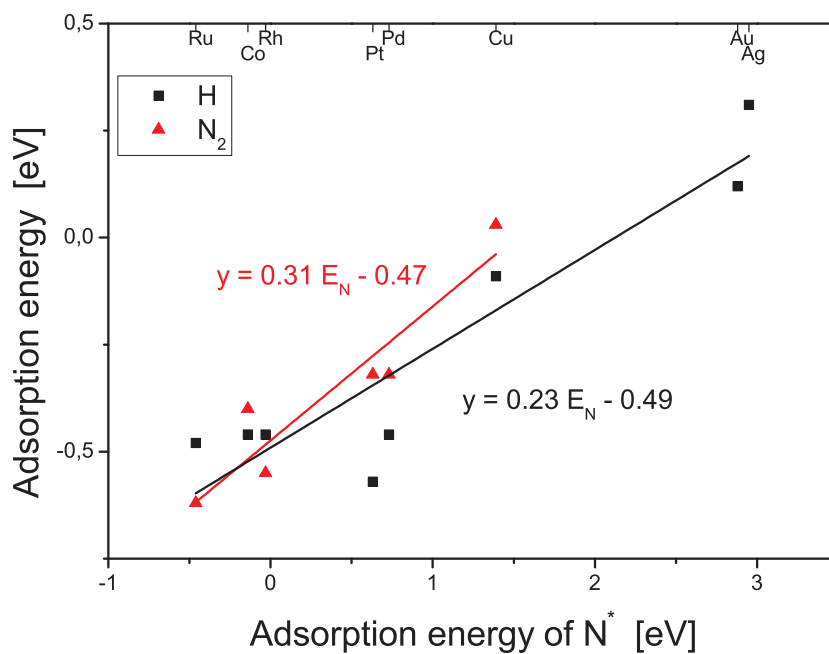

FIG. 6. The scaling relations of N<sub>2</sub> and H species on the stepped fcc(211) surface consisting of transition metals.

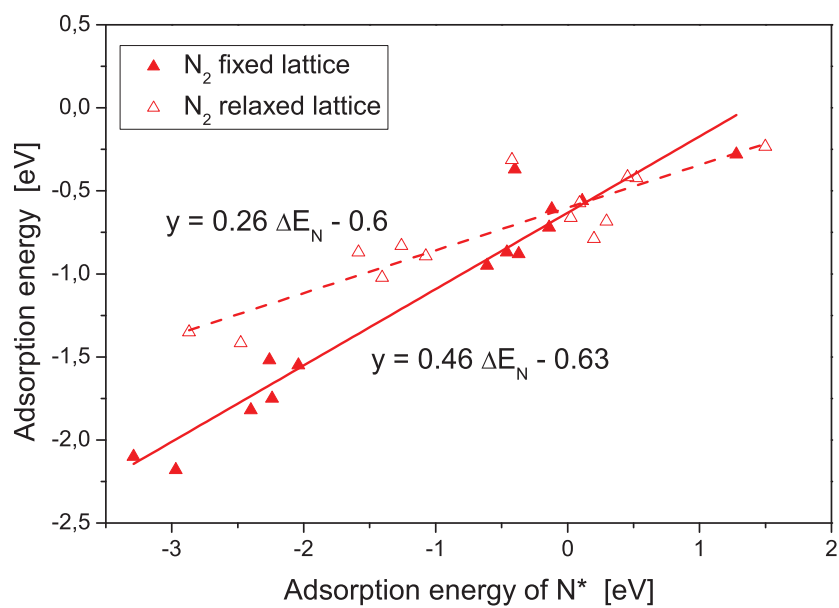

FIG. 7. The scaling relations of the  $N_2$  specie on both the bulk M12 and relaxed M12.

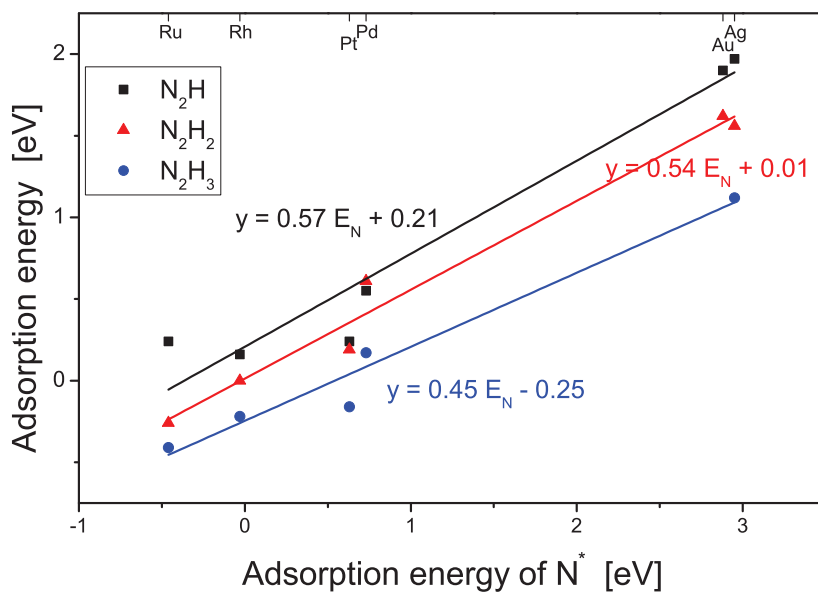

FIG. 8. The scaling relations for  $N_2H_x$  species on the stepped  $fcc(211)$  surface consisting of transition metals.

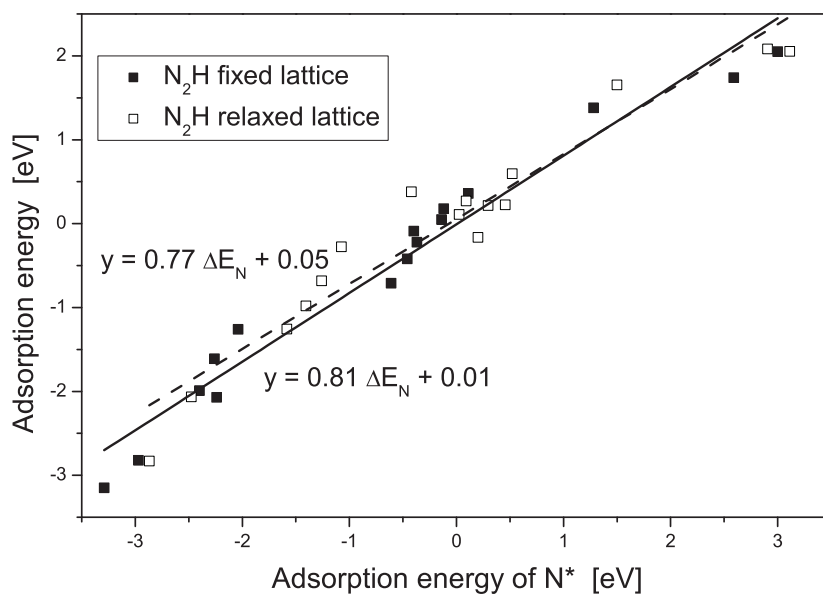

FIG. 9. The scaling relations of the  $N_2H$  specie on both the bulk M12 and relaxed M12.

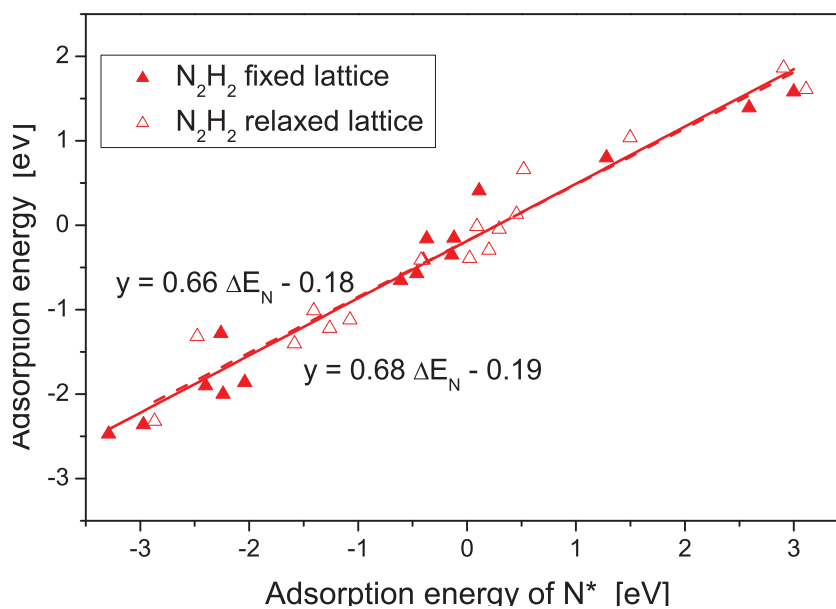

FIG. 10. The scaling relations of the  $N_2H_2$  specie on both the bulk M12 and relaxed M12.

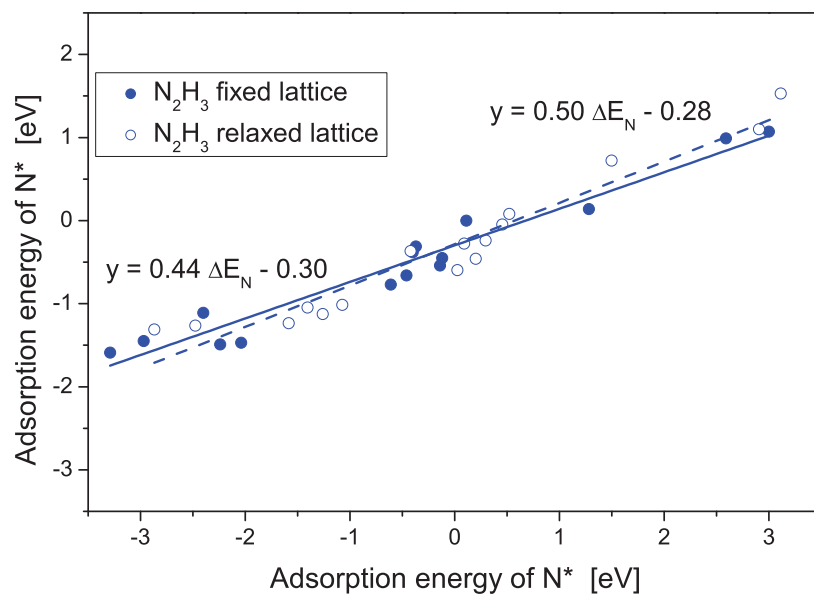

FIG. 11. The scaling relations of the N<sub>2</sub>H<sub>3</sub> specie on both the bulk M12 and relaxed M12.

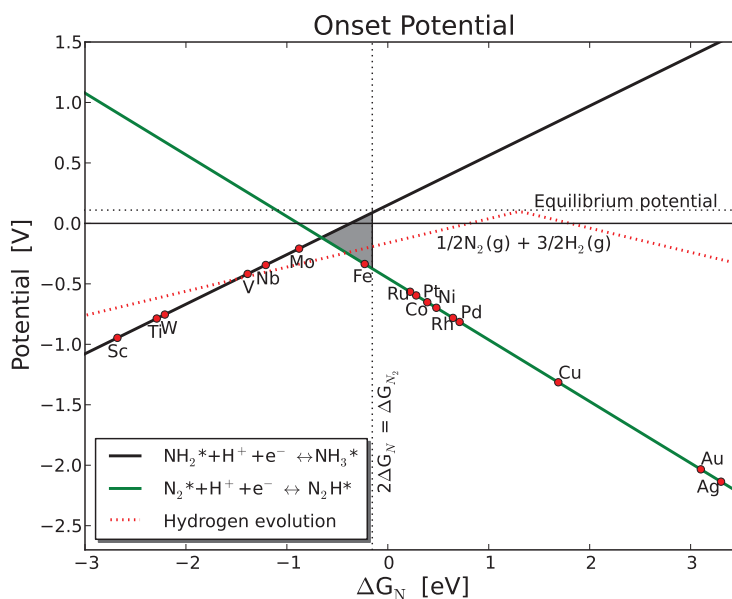

FIG. 12. The volcano plot established with no use of the calculated free energy corrections for the reaction intermediates. Leaving out the free energy corrections there is a minor shift for the top of the volcano where the free energy for adsorbed an adsorbed nitrogen adatom moves from  $-0.5$  eV to  $-0.6$  eV while the onset potential moves up with  $0.4$  eV. The potential determining step is still the same for the new volcano and the overall trend is the same, however  $\text{NH}_3$  is now favored compared to HER. The fact that the top of the volcano is positioned close to the same free energy of adsorbed nitrogen adatom indicate that the overall trends for these very undercoordinate reaction sites are to a large degree independent on the calculated free energy corrections.
