# Supplementary figures and images for: DFT based study of transition metal nano-clusters for electrochemical NH3 production
Source: Royal Society of Chemistry journal article supplement (doi:10.1039/c3cp44641g), 2013-01-01

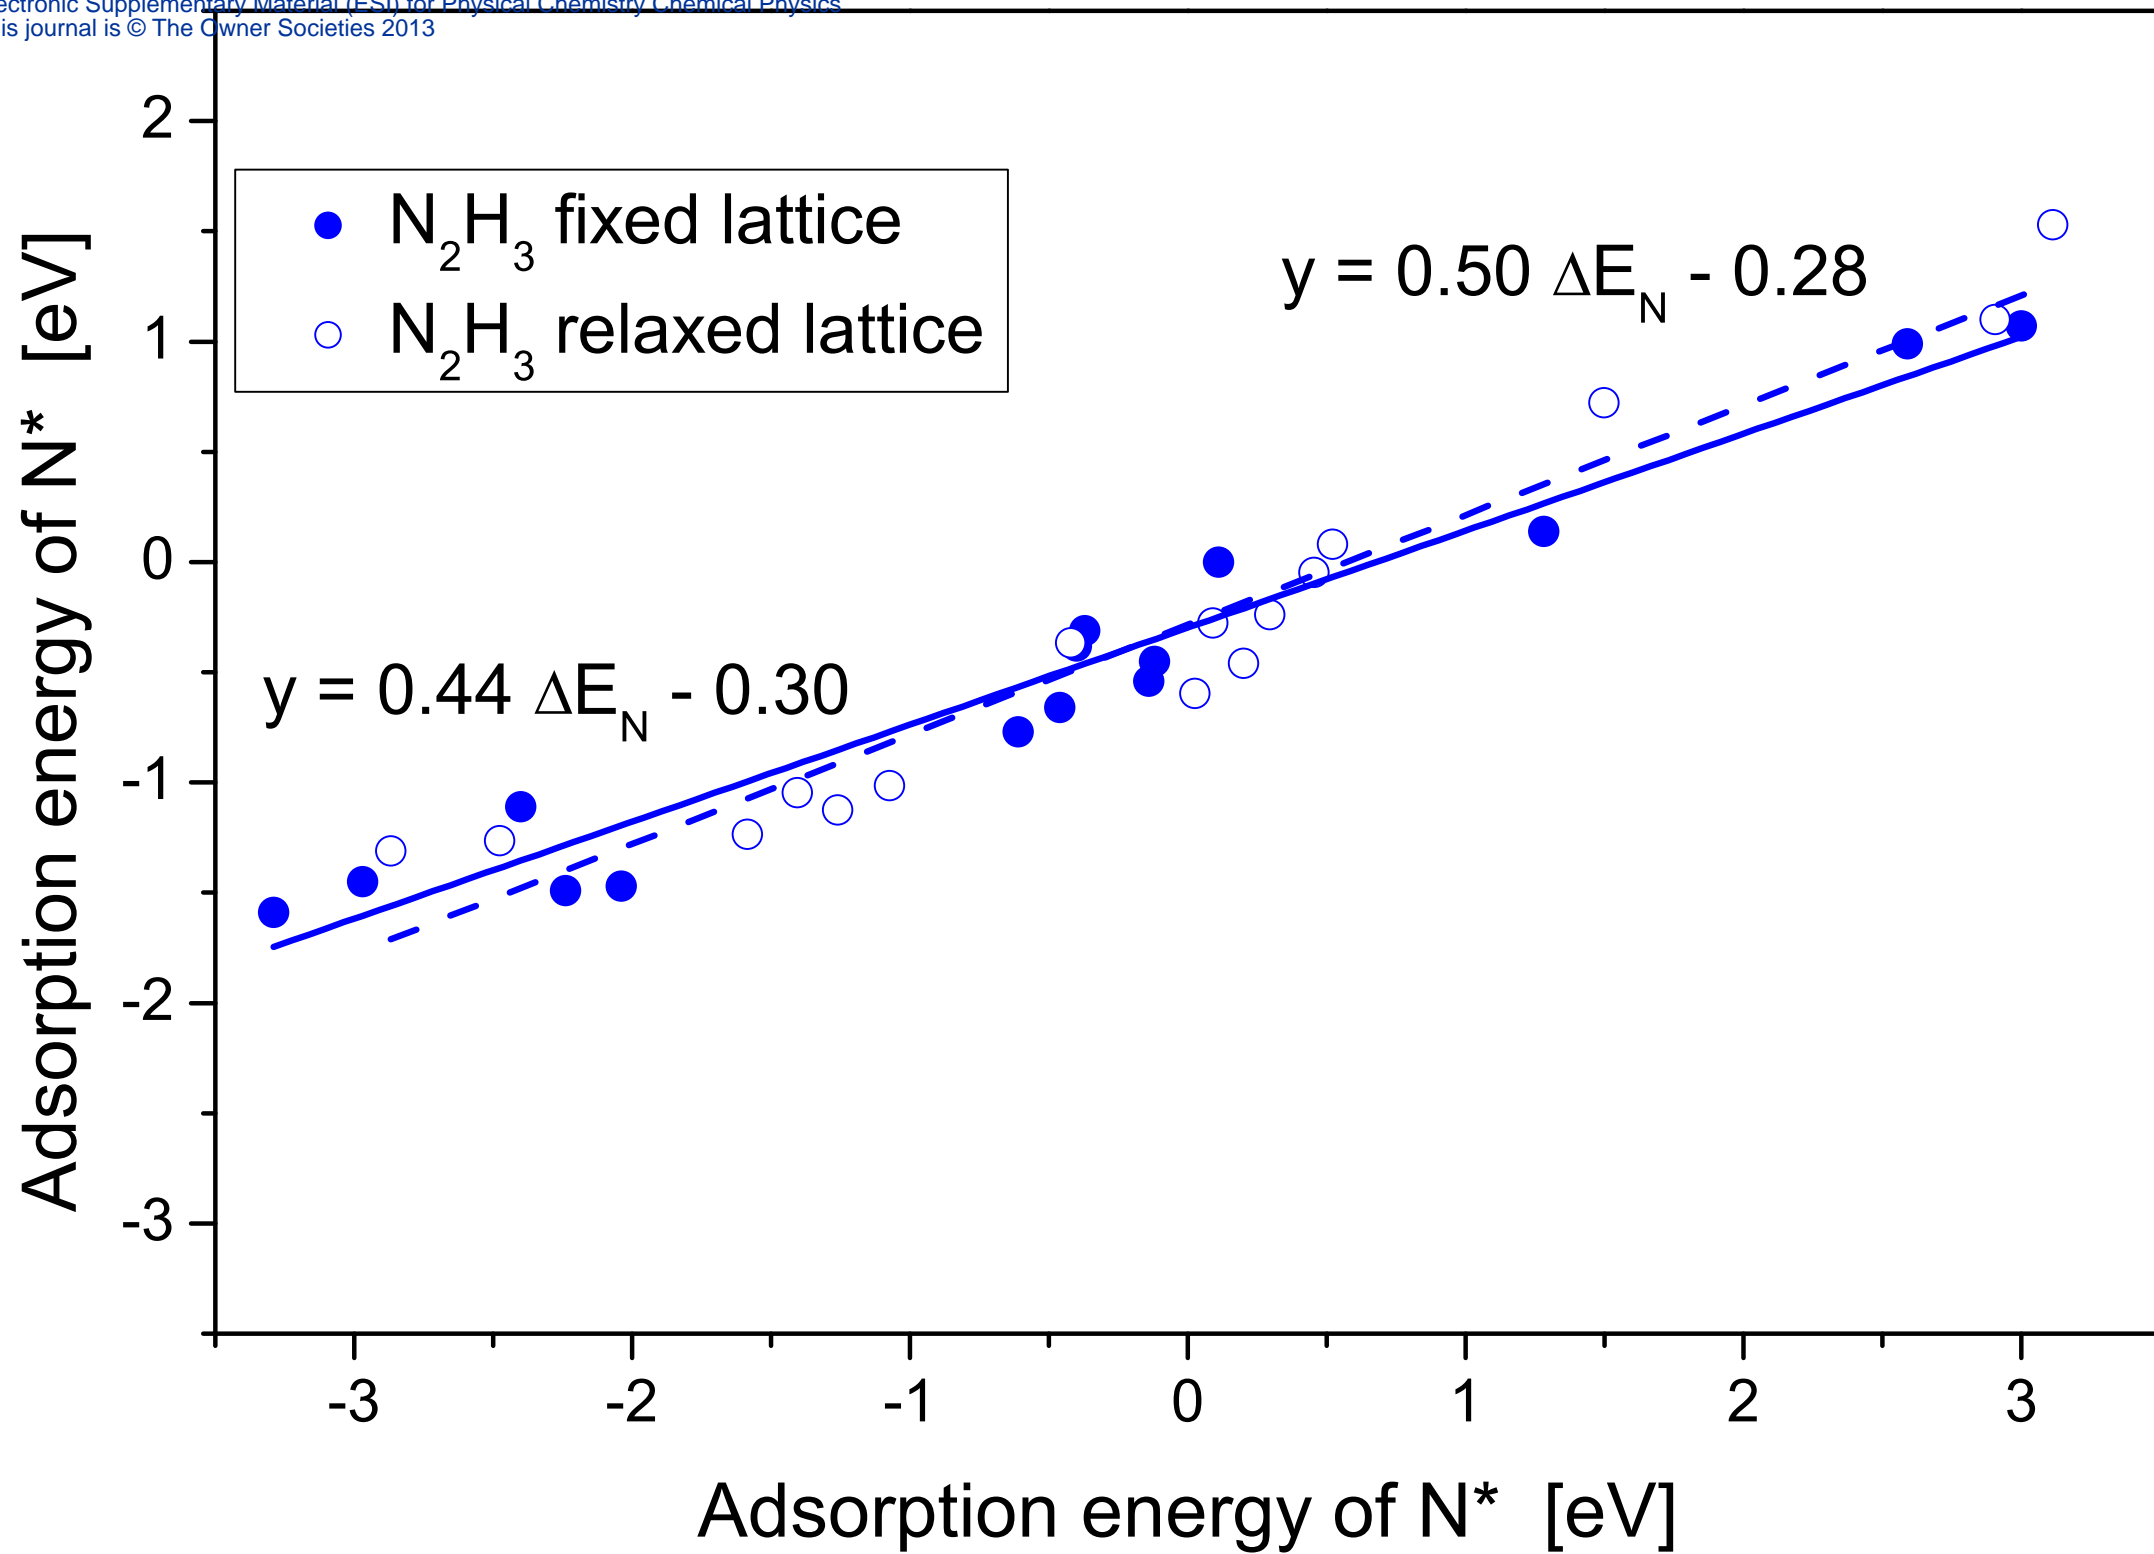

Supplement: c3cp44641g_12.pdf [file c3cp44641g_12.pdf]

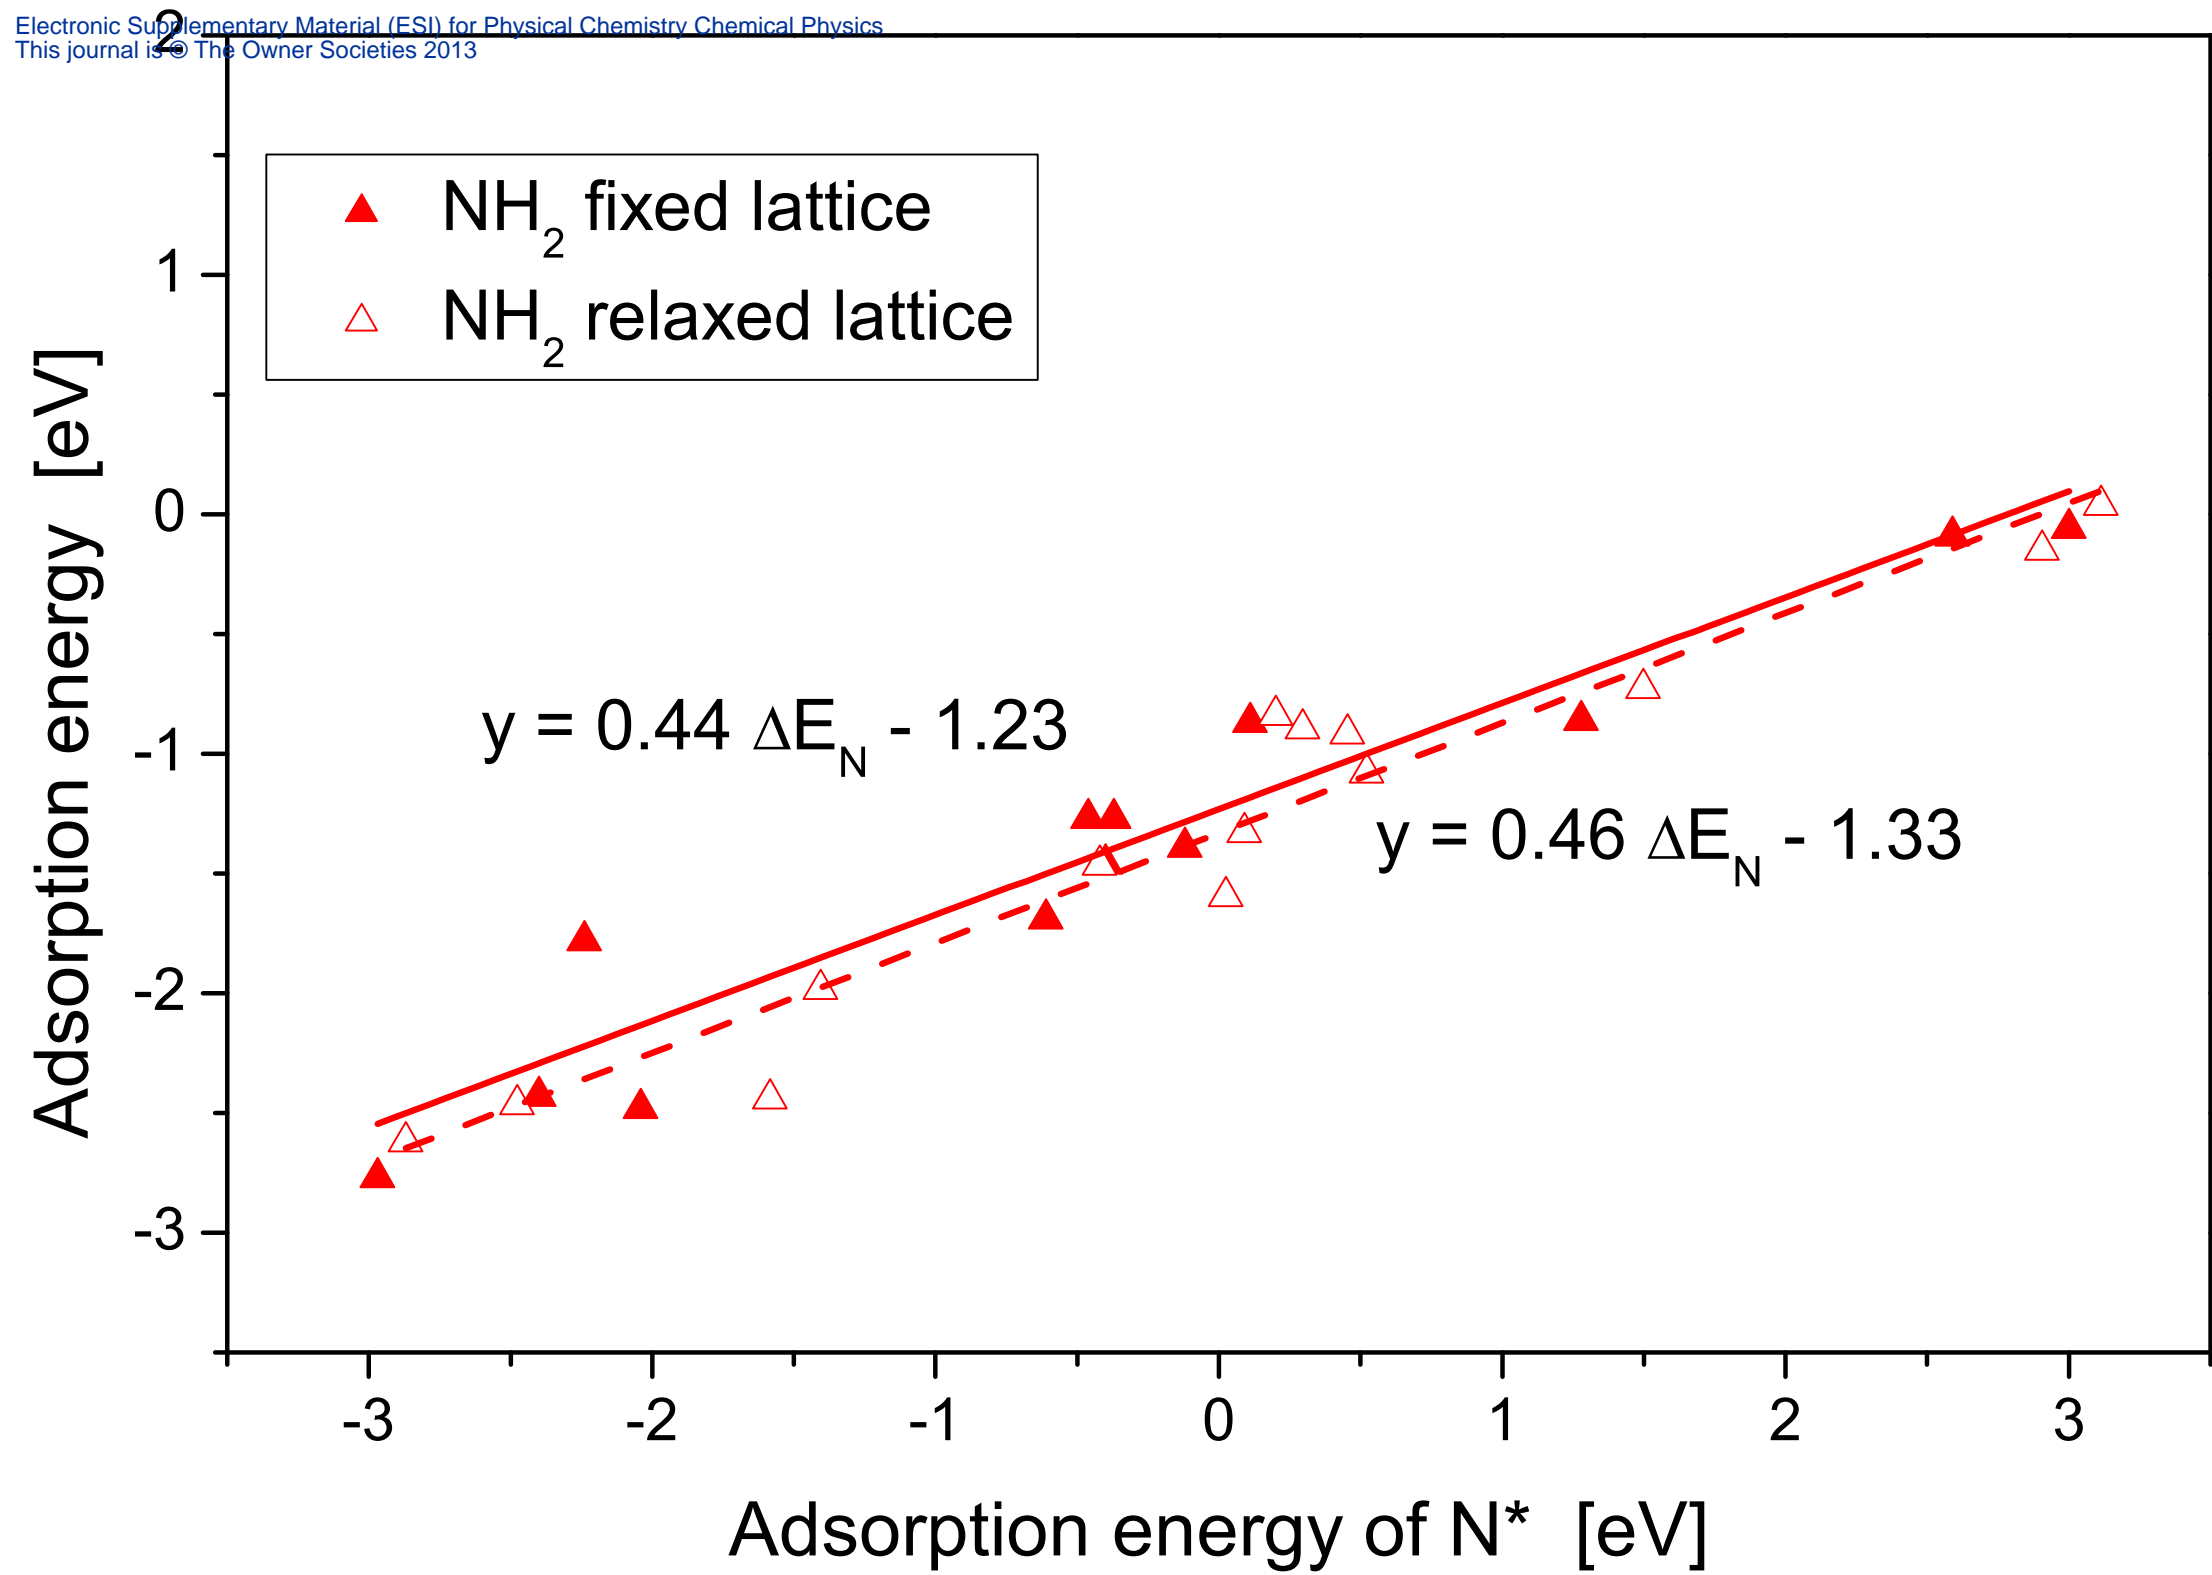

Supplement: c3cp44641g_3.pdf [file c3cp44641g_3.pdf]

Adsorption energy [eV]

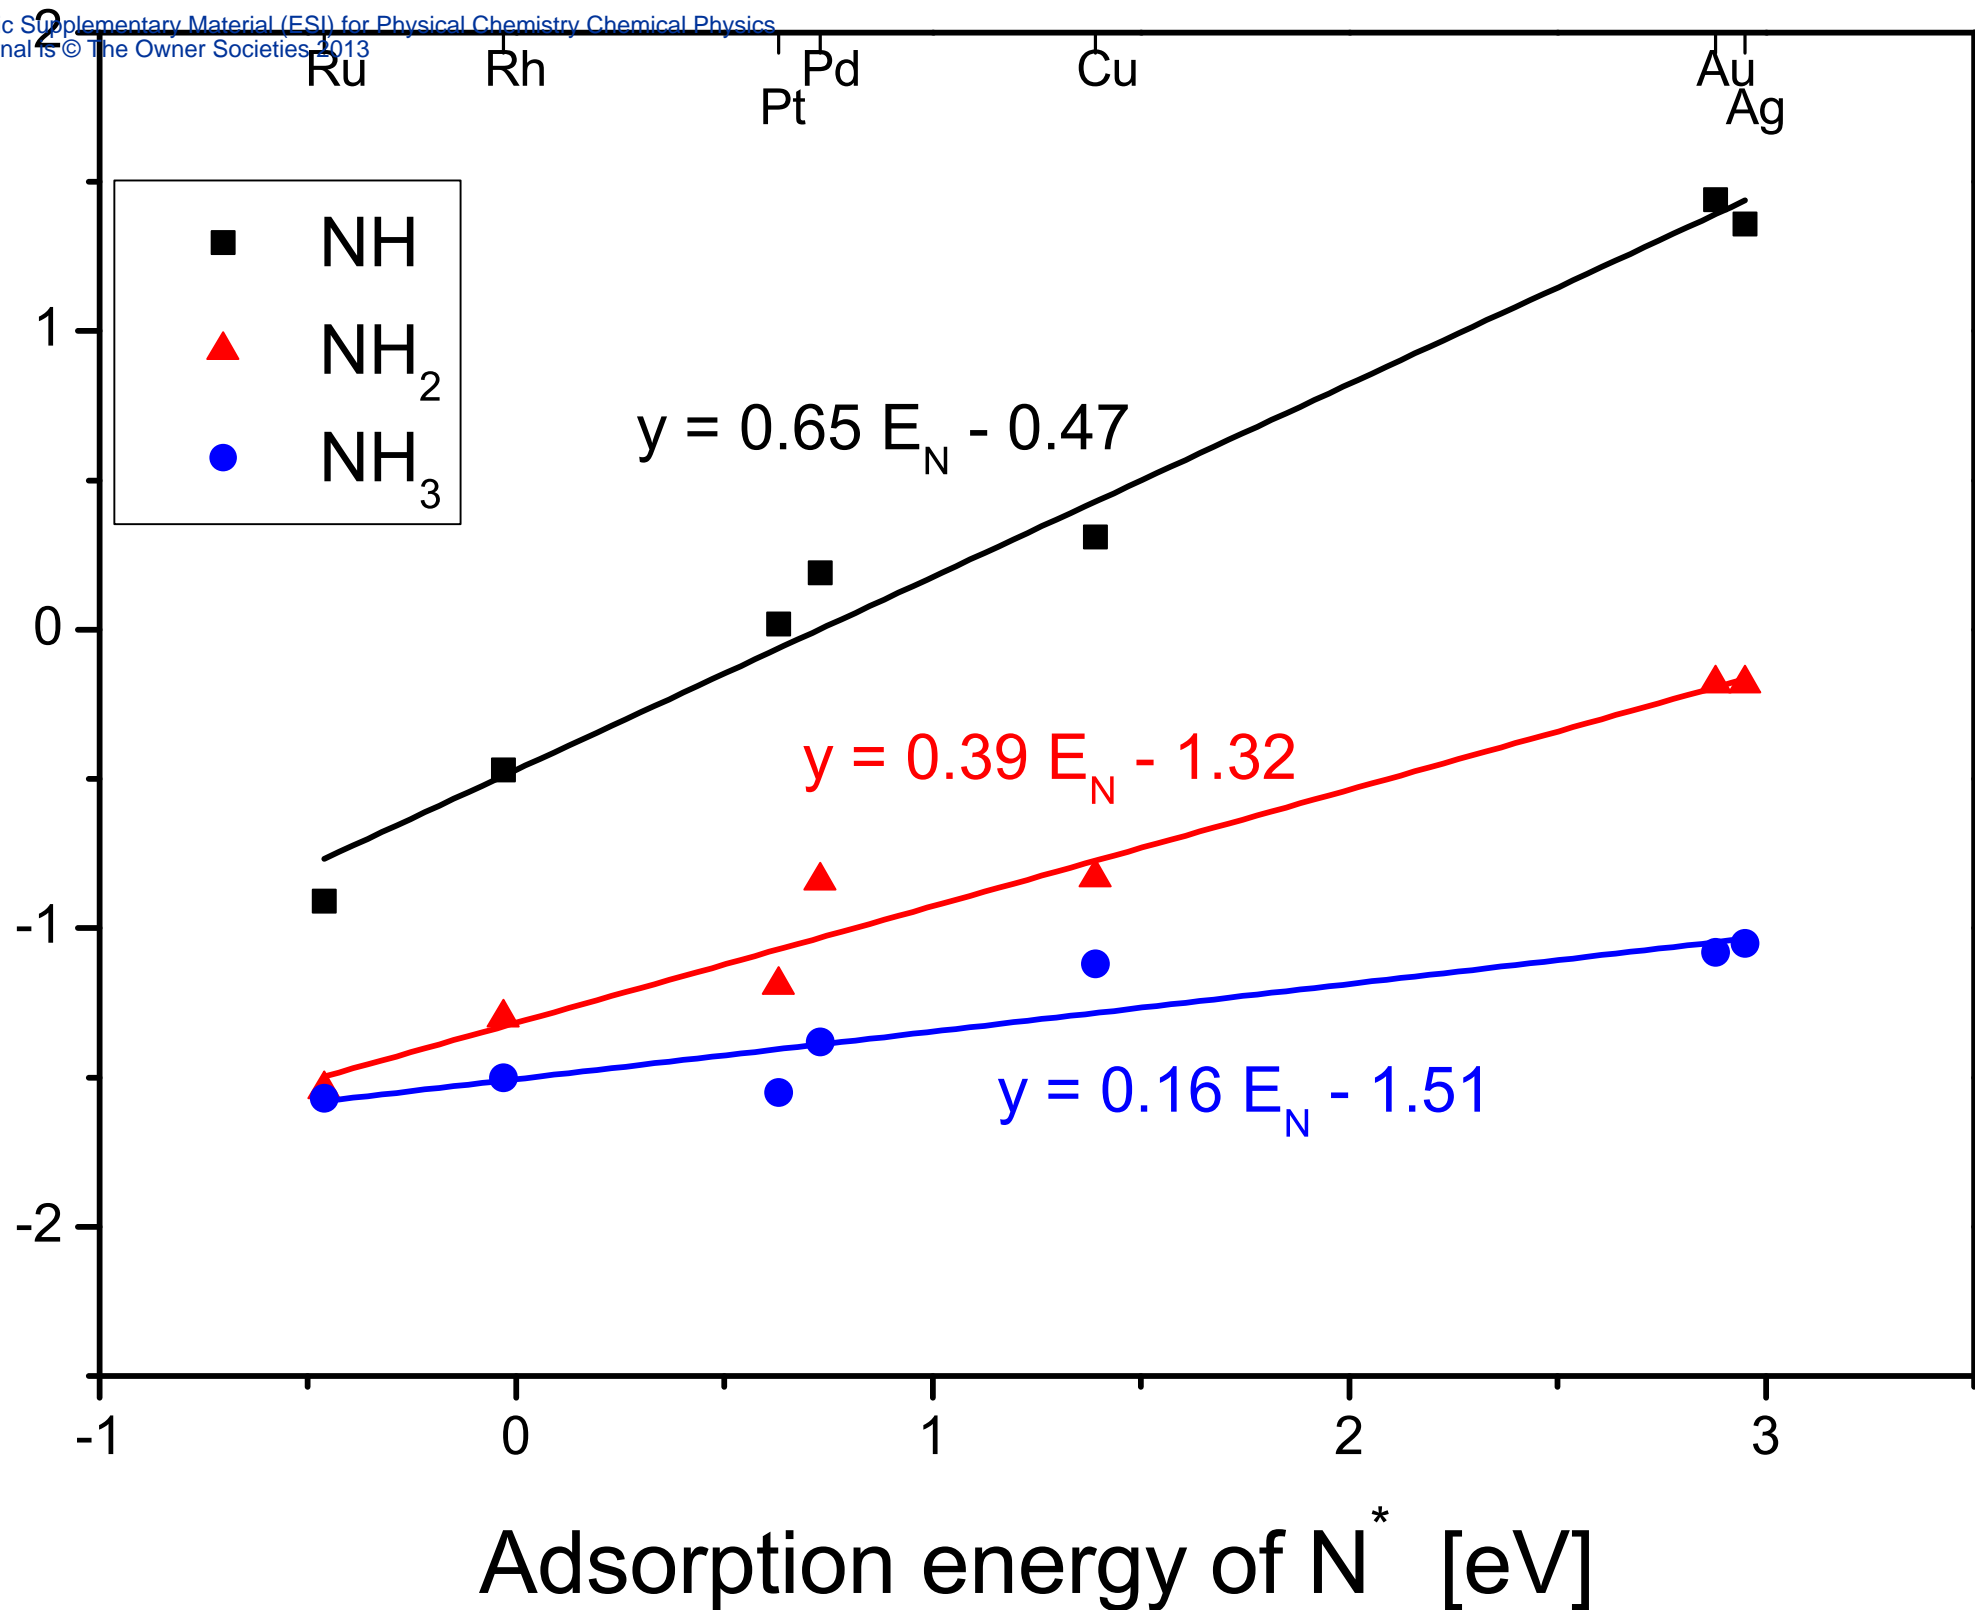

Supplement: c3cp44641g_5.pdf [file c3cp44641g_5.pdf]

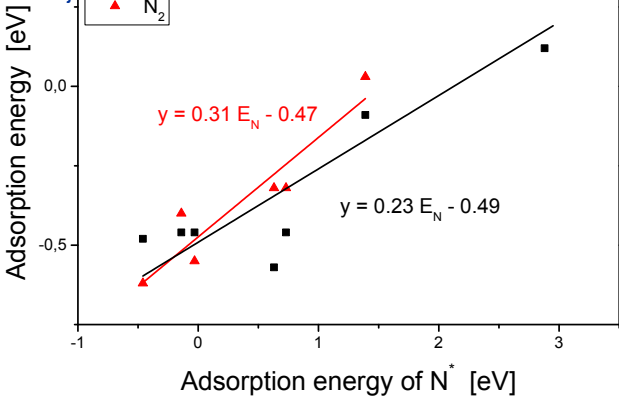

Supplement: c3cp44641g_7.pdf [file c3cp44641g_7.pdf]

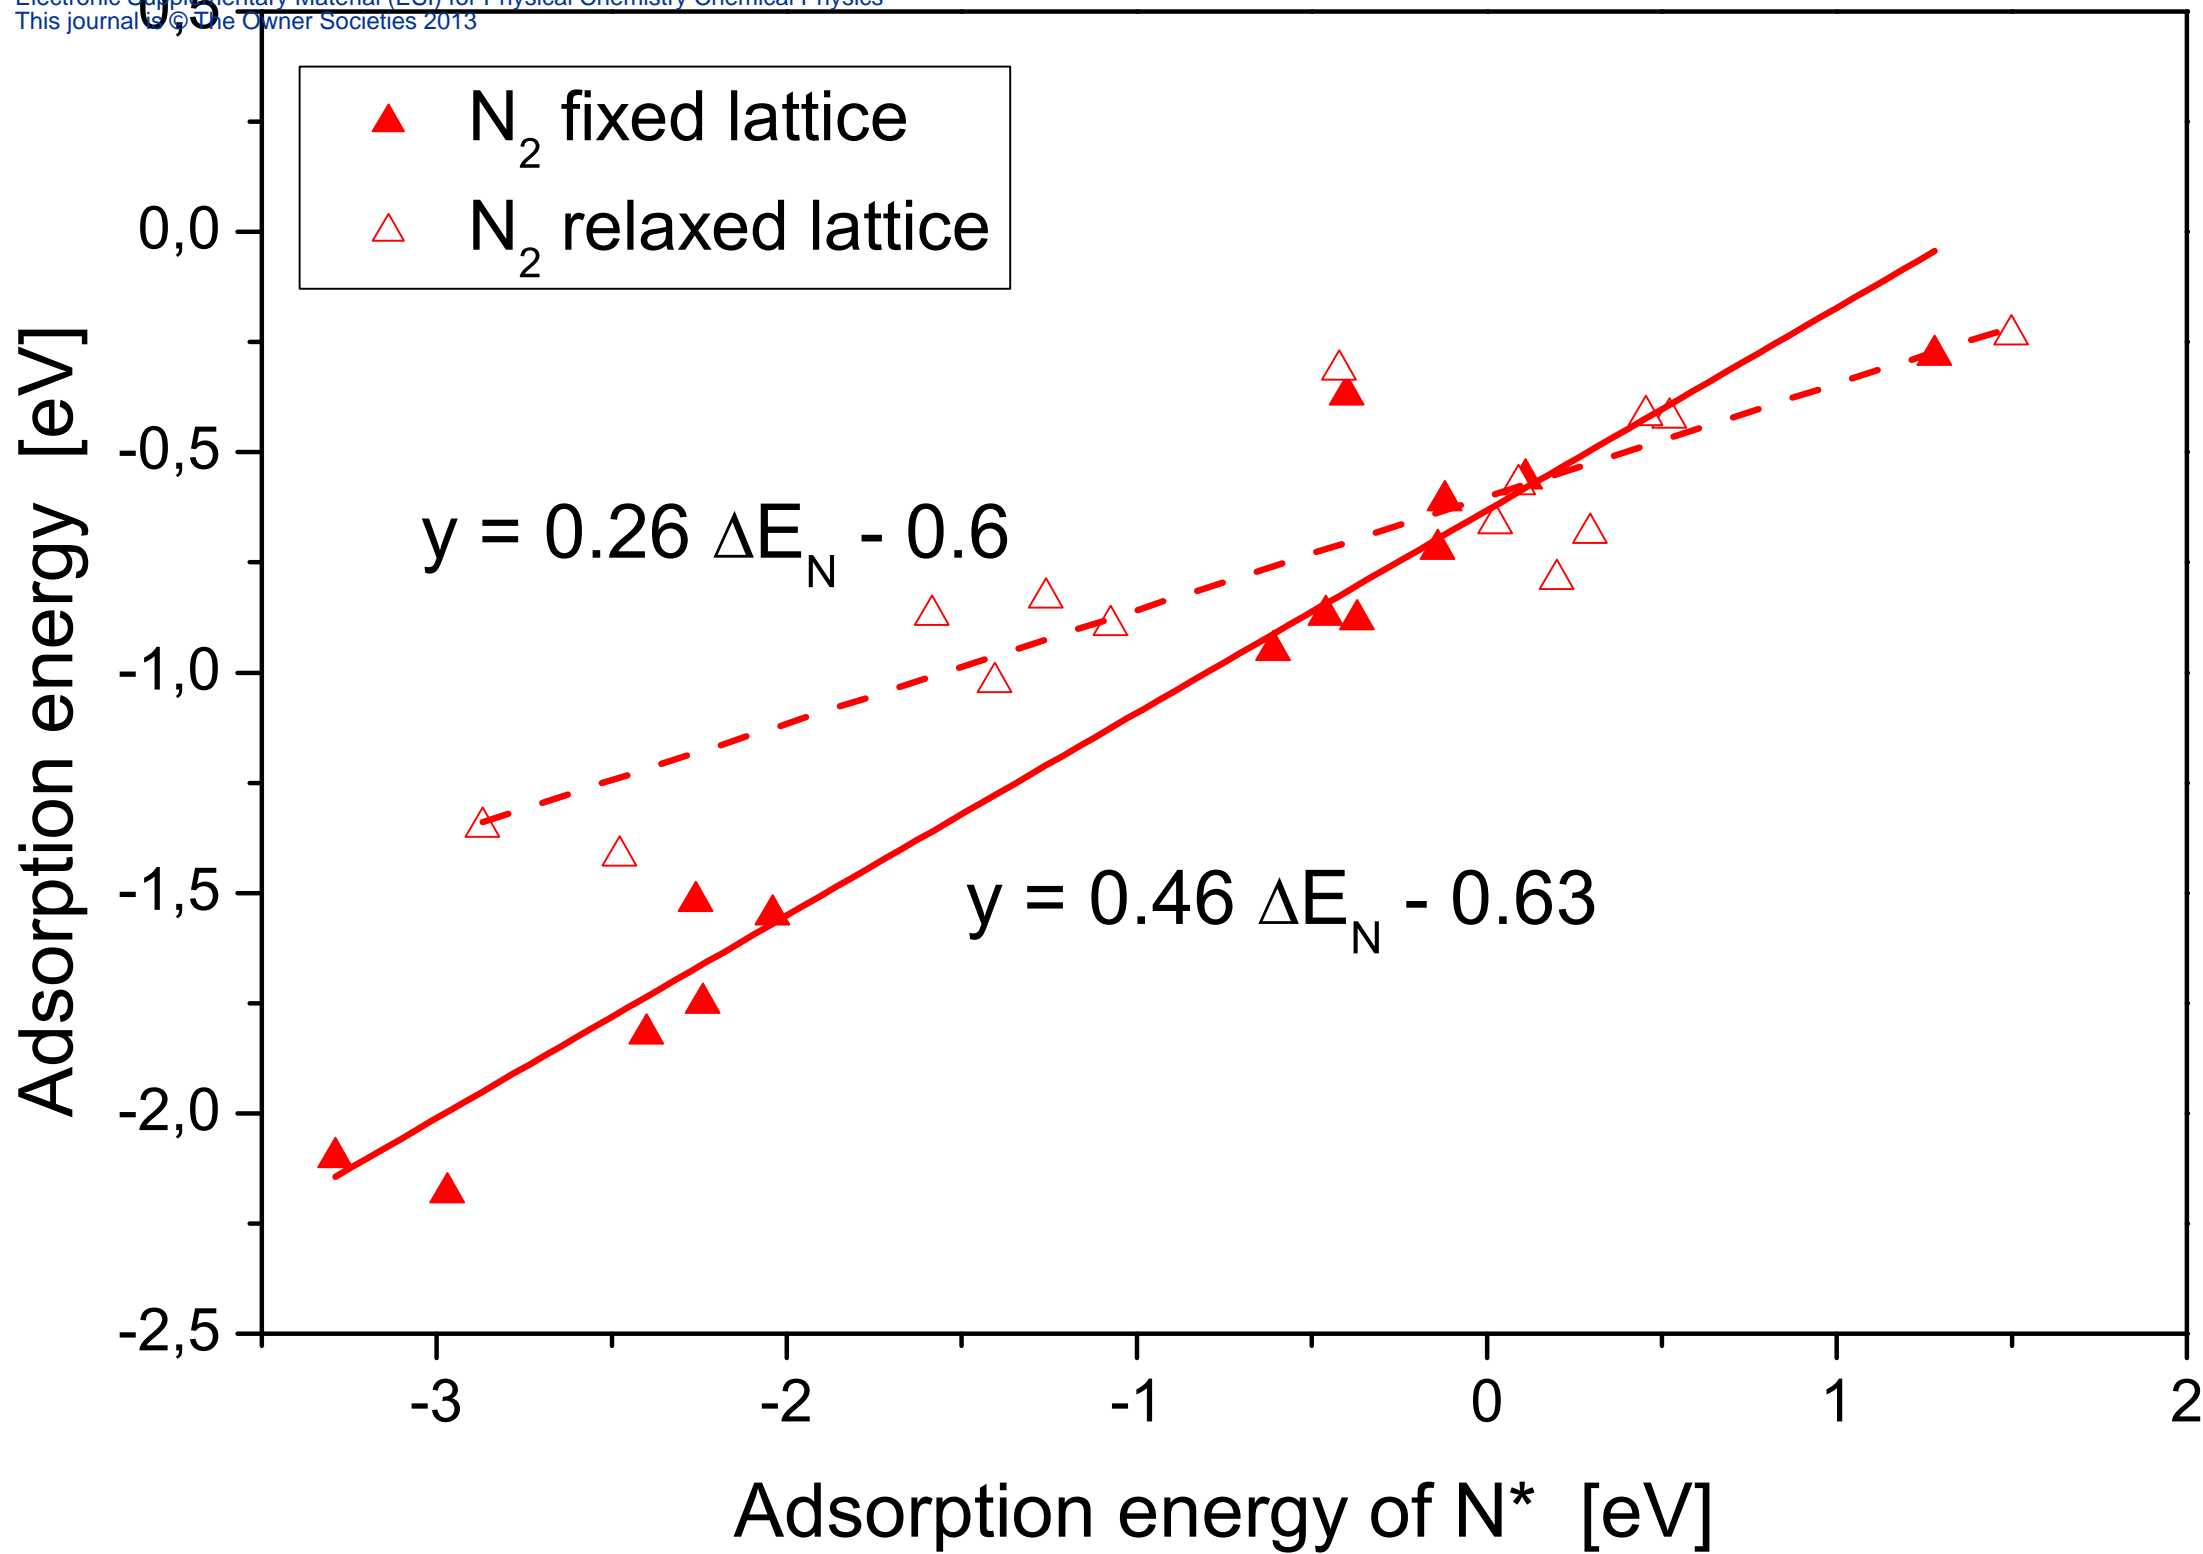

Supplement: c3cp44641g_8.pdf [file c3cp44641g_8.pdf]

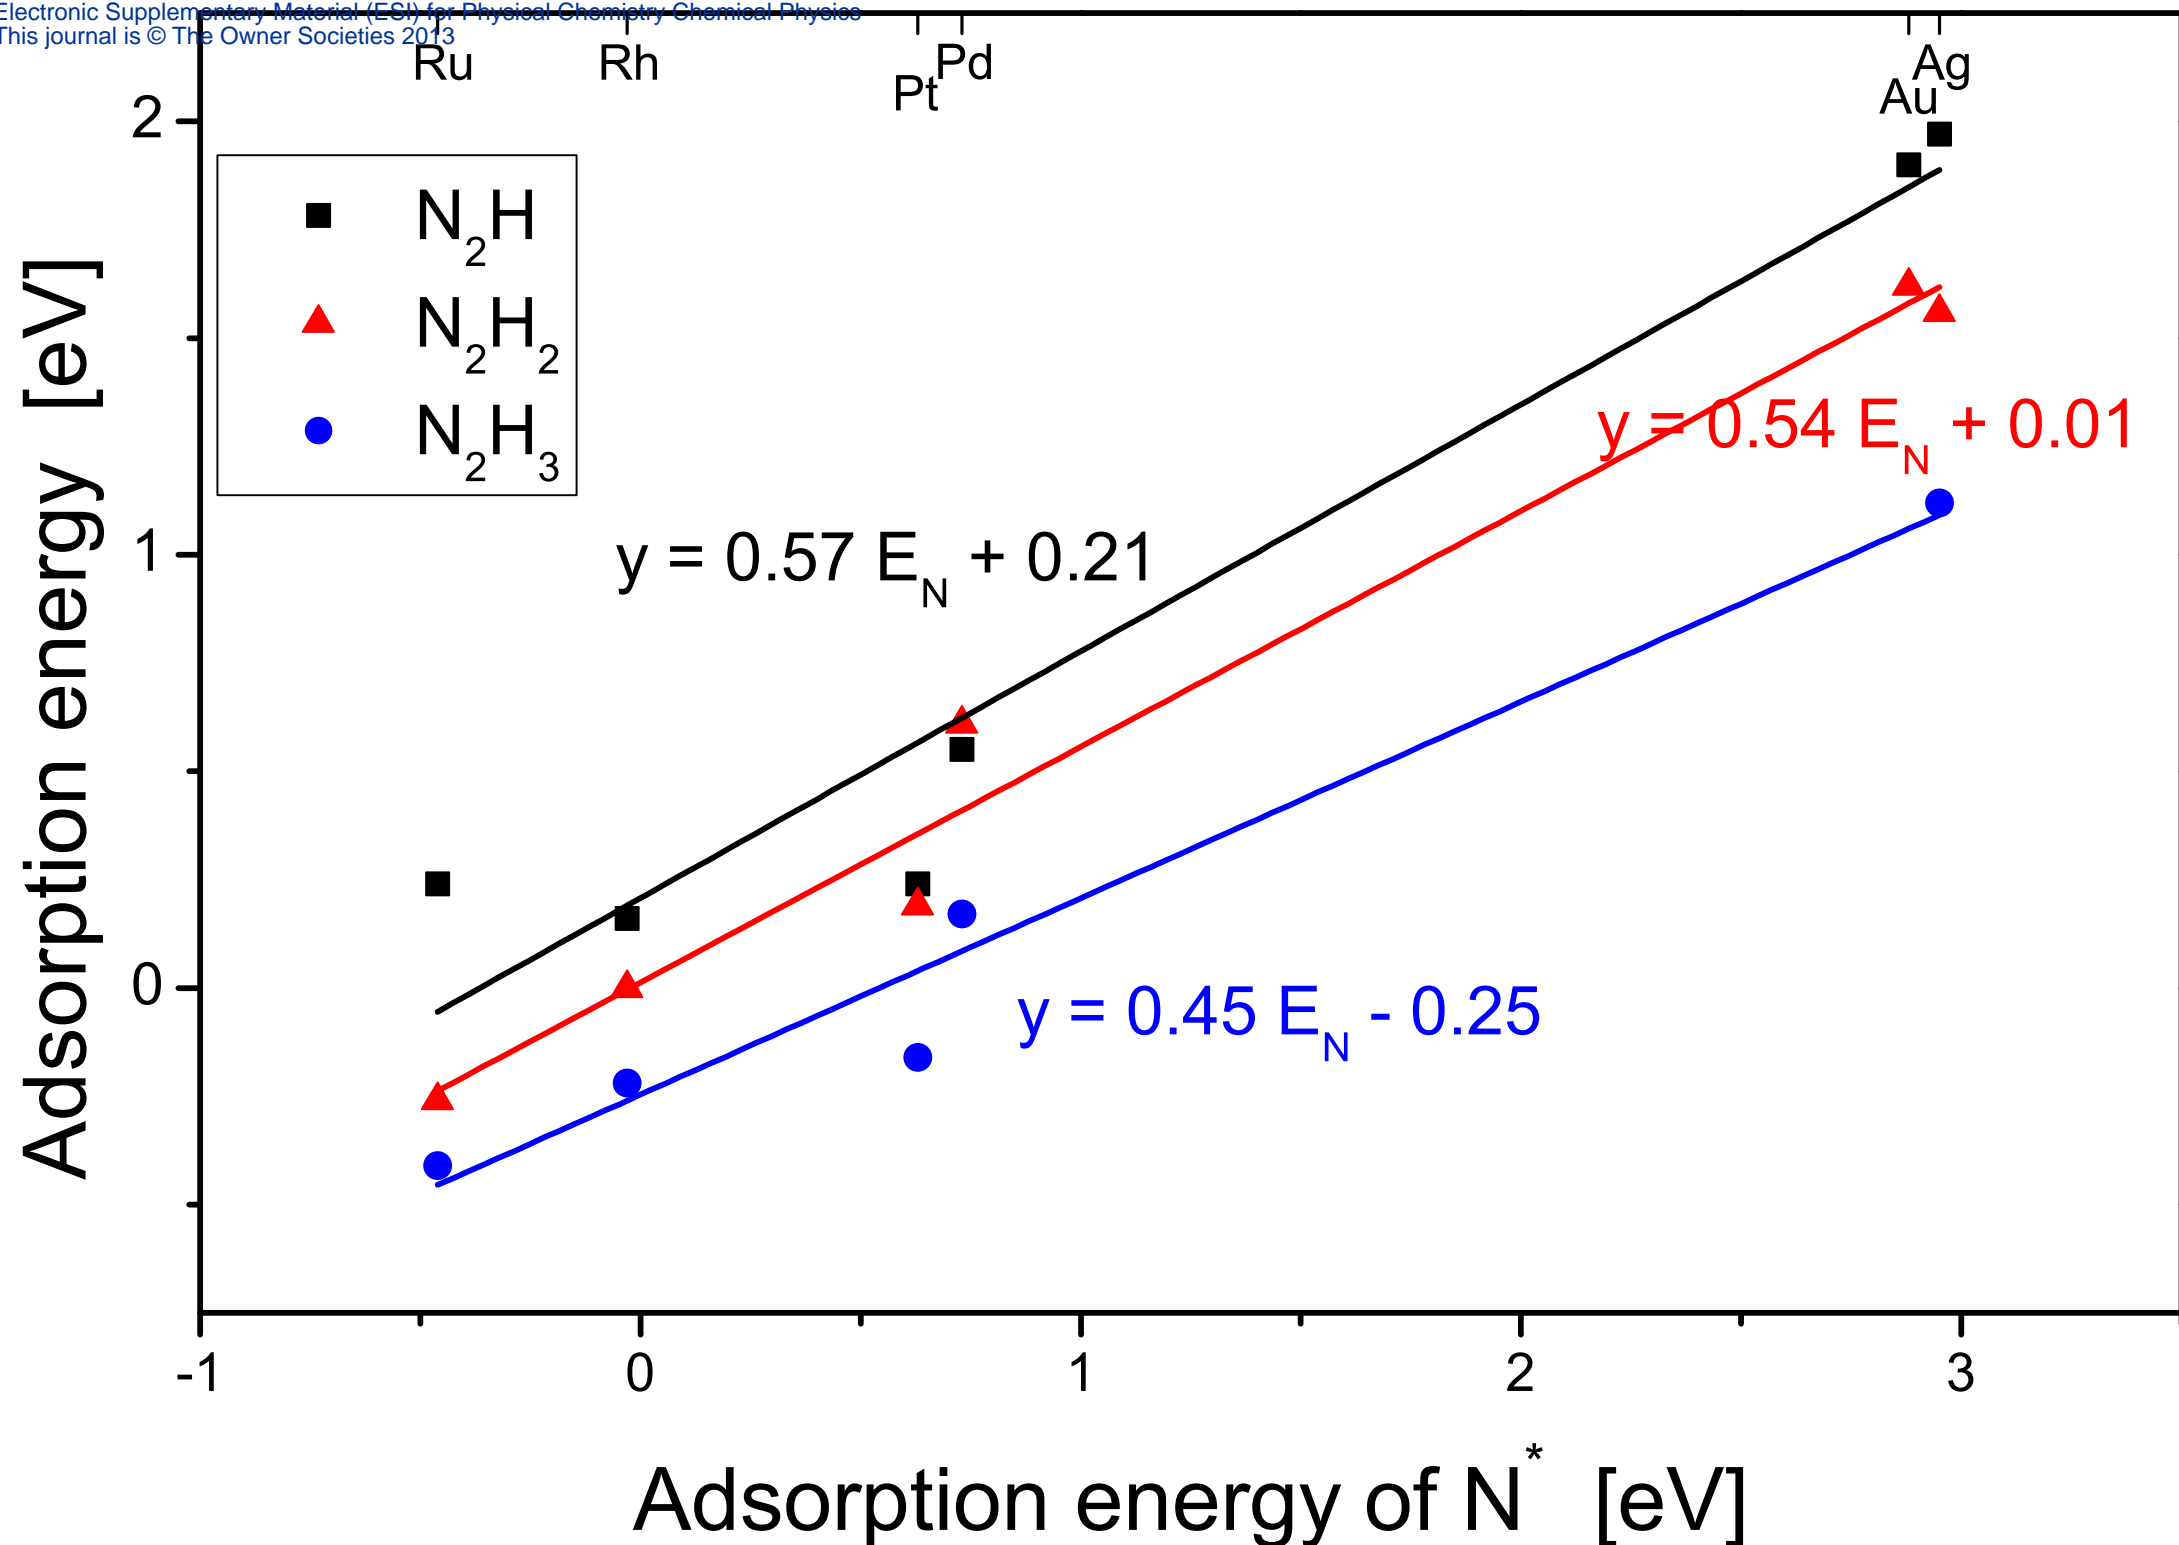

Supplement: c3cp44641g_9.pdf [file c3cp44641g_9.pdf]
